# Supplementary material
Source: PubMed Central journal article supplement (PMC390315)
Supplement: nar_32_4_e43__1.pdf [file nar_32_4_e43__1.pdf]

| Table 1. PCR Primers used to amplify the human miRNAs precursors. miRNA sequences are from reference (19) in the text. |                           |                          |                                 |
|------------------------------------------------------------------------------------------------------------------------|---------------------------|--------------------------|---------------------------------|
| Gene                                                                                                                   | Forward primer (5' → 3')  | Reverse primer (5' → 3') | Tm primers (Forward/Reverse) °C |
| U6                                                                                                                     | CTCGCTTCGGCAGCACA         | AACGCTTCACGAATTTGCGT     | 59/59                           |
| let-7d                                                                                                                 | AACGCTTCACGAATTTGCGT      | AAGGCAGCAGGTCGTATAGT     | 55/53                           |
| miR-15a                                                                                                                | GTAGCAGCACATAATGGTTTGTG   | GCAGCACAATATGGCCTG       | 56/55                           |
| miR-16                                                                                                                 | GCAGCACGTAAATATTGGCGT     | CAGCAGCACAGTTAAATACTGGAG | 59/57                           |
| miR-18                                                                                                                 | TAAGGTGCATCTAGTGCAGATAG   | GAAGGAGCACTTAGGGCAGT     | 53/55                           |
| miR-20                                                                                                                 | GCACTAAAGTGCTTATAGTGCAG   | GTACTTTAAGTGCTCATAATGCA  | 53/51                           |
| miR-21                                                                                                                 | GCTTATCAGACTGATGTTGACTG   | CAGCCATCGACTGGTG         | 53/55                           |
| miR-24-2                                                                                                               | CTCCCGTGCCTACTGAGCT       | CCCTGTTCTGCTGAACTGAG     | 57/59                           |
| miR-28                                                                                                                 | GGAGCTCACAGTCTATTGAGTTACC | CCTCCAGGAGCTCACAATCT     | 56/56                           |
| miR-29                                                                                                                 | ATGACTGATTTCTTTTGGTG      | ATAACCGATTTTCAGATGGTG    | 49/51                           |
| miR-30a                                                                                                                | GTA AACATCCTCGACTGGAAGCT  | GCTGCAAACATCCGACTGAA     | 58/58                           |
| miR-30d                                                                                                                | GTTGTTGTAAACATCCCCGAC     | GCAGCAAACATCTGACTGAAAG   | 56/56                           |
| miR-33                                                                                                                 | TGTGGTGCATTGTAGTTGCA      | CTGTGATGCACTGTGGAAAC     | 56/54                           |
| miR-92-1                                                                                                               | TCTACACAGGTTGGGATCGG      | CGGGACAAGTGCAATACCATA    | 57/57                           |
| miR-93-1                                                                                                               | AAGTGCTGTTTCGTGCAGG       | CTCGGGAAGTGCTAGCTCA      | 55/55                           |
| miR-101                                                                                                                | GCCCTGGCTCAGTTATC         | GCCATCCTTCAGTTATCACAGTA  | 57/55                           |

|                |                             |                        |       |
|----------------|-----------------------------|------------------------|-------|
|                | ACA                         |                        |       |
| miR-105-1      | CAAATGCTCAGACTCCT<br>GTGGT  | GCACATGCTCAAACATCCGT   | 58/58 |
| miR-107        | CAGCTTCTTTACAGTGTT<br>GCCT  | GATAGCCCTGTACAATGCTGC  | 56/56 |
| miR-124a-<br>2 | TCCGTGTTACAGCGGA<br>C       | CATTCACCGCGTGCCTTA     | 58/58 |
| miR-147        | CTAAAGACAACATTTCT<br>GCACAC | ATCTAGCAGAAGCATTTCAC   | 53/53 |
|                |                             |                        |       |
| miR-216        | TGGCTTAATCTCAGCTG<br>GCA    | TGAGGGCTAGGAAATTGCTCT  | 58/58 |
| miR-219        | TCCTGATTGTCCAAACG<br>CAA    | GGGACGTCCAGACTCAACTCTC | 59/59 |
| miR-220        | CCACACCGTATCTGACA<br>CTTT   | CAGACCGCATCATGAACAC    | 54/54 |
| miR-224        | GGCTTCAAGTCACTAG<br>TGGTTC  | CTTTGTAGTCACTAGGGCACCA | 56/56 |
